# Supplementary material for: Towards ruthenium(ii) polypyridine complexes with prolonged and predetermined excited state lifetimesElectronic supplementary information (ESI) available: synthesis of the new ligands bpy–pyr and pyr–bpy–pyr and of their ruthenium compounds. See http://www.rsc.org/suppdata/cc/b1/b110291e/
Source: Royal Society of Chemistry journal article supplement (doi:10.1039/b110291e), 2002-02-20
Supplement: b110291e.doc [file b110291e.doc]

## Experimental

**General data.** All manipulations were performed under a dry nitrogen atmosphere using standard techniques, whilst protecting against light. 4,4’-Dimethyl-2,2’-bipyridine (dmb), lithium diisopropylamide (2 Molar), 1-pyrenemethanol, ruthenium(III)chloride hydrate were obtained from Aldrich and used as received. THF (Aldrich) was distilled immediately before use. 1-(Chloromethyl)pyrene1 Ru(dmb)2Cl22, and [Ru(dmb)3](PF6)23 were prepared according to published procedures. Neutral alumina (Aldrich) was used in column chromatography.

**Synthesis of ligands bpy-pyr and pyr-bpy-pyr:**

**4-Methyl-4’-[2-(1-pyrenyl)ethyl]-2,2’-bipyridine (bpy-pyr)**

4,4’-Dimethyl-2,2’-bipyridine (0.50 g, 2.71 mmol) was dissolved in dry THF (40 ml) under a nitrogen atmosphere. After cooling to –10ºC, lithium diisopropylamide (1.2 ml) was added dropwise over a 5 min. period via syringe. After stirring for an additional 45 min., a solution of 1-(chloromethyl)pyrene (0.48 g, 1.92 mmol) in THF (25 ml) was introduced dropwise by cannula. The reaction mixture was stirred at –10ºC for 30 min, and then allowed to warm to ambient temperature and reacted for a further 20 h. After this time, water (5 ml) was added dropwise and solvents were removed under reduced pressure. The residue was then dissolved in dichloromethane and washed with water. The separated organic phase was dried over magnesium sulfate, filtered and the solvent was removed. The residue was then triturated with methanol:water, 4:1 v/v (20 ml). The resulting solid was collected and then triturated with methanol (25 ml). The product, which was collected by filtration and dried under vacuum, was an off-white powder. (yield = 63%).

1H NMR (CDCl3):  8.58 - 8.55 (m, 2H), 8.40 - 7.81 (m, 11H), 7.17 - 7.10 (m, 2H), 3.73 (t, 2H, *J* = 8 Hz), 3.26 (t, 2H, *J* = 8 Hz), 2.45 (s, 3H). Elemental analysis data (for C29H22N2), calc. (found): C, 87.40 (87.28); H, 5.57 (5.59); N, 7.03% (6.99%). MS (FAB): m/z 398.

**4,4’-Bis[2-(1-pyrenyl)ethyl] -2,2’-dipyridine (pyr-bpy-pyr)**

4,4’-Dimethyl-2,2’-bipyridine (0.40 g, 2.17 mmol) was dissolved in dry THF (40 ml) under a nitrogen atmosphere. After cooling to –10ºC, lithium diisopropylamide (2.6 ml) was added dropwise over a 5 min. period via syringe. After stirring for an additional 45 min., a solution of 1-(chloromethyl)pyrene (1.20g, 4.79 mmol) in THF (25 ml) was introduced dropwise by cannula. The reaction mixture was stirred at –10ºC for 30 min, and then allowed to warm to ambient temperature and reacted for a further 20 h. After this time, water (5 ml) was added dropwise and solvents were removed under reduced pressure. The residue was then dissolved in dichloromethane and washed with water. The separated organic phase was dried over magnesium sulfate, filtered and the solvent was removed. The residue was then triturated with methanol:water, 4:1 v/v (20 ml). The resulting solid was collected and then triturated with methanol (25 ml). The crude product was recrystallised from a minimum volume of chloroform and collected by vacuum filtration on a Buchner funnel (yield = 38%).

1H NMR (CDCl3):  8.58 - 7.85 (m, 22H), 7.13 (d, 2H, J = 5Hz), 3.74 (t, 4H, J = 8Hz), 3.26 (t, 4H, J = 8Hz). Elemental analysis data (for C46H32N2), calc. (found): C, 90.16 (90.35); H, 5.26 (5.34); N, 4.57 (4.41). MS (FAB): m/z 612.

**Synthesis of complexes:**

**[Ru(L)3](PF6)2 (i)**

**[Ru(dmb)3](PF6)2 (0), [Ru(bpy-pyr)3](PF6)2 (3), [Ru(pyr-bpy-pyr)3](PF6)2 (6)**

RuCl3.xH2O (0.15 mmol) and ligand L (0.45 mmol) were dissolved in DMF (6 ml) and refluxed for 24 h under nitrogen. After cooling to room temperature, excess solid NH4PF6 was added. The solution was left to stir for 30 min, before loading onto a column of neutral alumina, and eluting with acetonitrile:toluene, 2:1 v/v. Solvent was removed under reduced pressure until a precipitate was obtained. The solid was collected by vacuum filtration through a fine glass frit and washed with water, followed by diethyl ether. The complex was further purified through Sephadex G10, eluting with acetonitrile, before reprecipitating from acetonitrile/toluene.

**Ru(L)2Cl2 (ii)**

**Ru(bpy-pyr)2Cl2; Ru(pyr-bpy-pyr)2Cl2**

A suspension of anhydrous LiCl (4.68 mmol) and RuCl3.xH2O (0.72 mmol) in dry DMF (20ml) was degassed and stirred for 10 min at 70ºC. Ligand L (1.44 mmol) was added to this solution and the mixture stirred for 40 hours at 70ºC under a nitrogen atmosphere. This solution was cooled to room temperature, cold acetone (50 ml) was added and the solution was left in the freezer (-25°C) overnight. The resulting precipitate formed was collected and washed with water, then diethyl ether, and reprecipitated from acetone/toluene.

**[Ru(L)2(L’)](PF6)2 (iii)**

**[Ru(dmb)2(bpy-pyr)](PF6)2 (1), [Ru(dmb)2(pyr-bpy-pyr)](PF6)2 (2a)**

**[Ru(bpy-pyr)2(dmb)](PF6)2 (2), [Ru(bpy-pyr)2(pyr-bpy-pyr)](PF6)2 (4)**

**[Ru(pyr-bpy-pyr)2(dmb)](PF6)2 (4a), [Ru(pyr-bpy-pyr)2(bpy-pyr)](PF6)2 (5)**

Ru(L)2Cl2 (0.23 mmol) and L’ (0.25 mmol) were suspended in methanol (30ml), and refluxed for 24 h while stirring under nitrogen, before cooling the reaction mixture to room temperature. Solid NH4PF6 was added and stirring was continued for 30 min. The precipitate formed was collected by filtration through a fine glass frit and washed with water, followed by diethyl ether to afford the crude orange product. The product was purified by chromatography, eluting with acetonitrile: toluene, 2:1 (v/v). The complex was further purified through Sephadex G10, eluting with acetonitrile, before reprecipitating from acetonitrile/toluene.

References

1. K.W. Bair, R.L. Tuttle, V.C. Knick, M. Cory, D.D. McKee, *J. Med. Chem.* 1990, **33**, 2385.
2. B. P. Sullivan, D. J. Salmon, T. J. Meyer, *Inorg. Chem.*, 1978, **17**, 3334.
3. N. H. Damrauer, T. R. Boussie, M. Devenney, J. K. McCusker, *J. Am. Chem. Soc.*, 1997, **119**, 8253.
